# Supplementary material for: Comparative secretome analysis of different smut fungi and identification of plant cell death-inducing secreted proteins from Tilletia horrida
Source: BMC Plant Biol. 2019 Aug 16;19:360. doi: 10.1186/s12870-019-1924-6 (PMC6697988; doi:10.1186/s12870-019-1924-6)
Supplement: Supplementary file 5 — Table S5. The sequence of mutated genes. (XLSX 9 kb) [file 12870_2019_1924_MOESM5_ESM.xlsx]

## Sheet: supplementary table 5
Supplementary Table S5 The sequence of mutated genes
gene name	mutated gene sequence
smut_2965-60	ATG AAG TTT GCC ACC CTC GCC GTT CTC TCT CTC GCC GCC GTC GTG GTG TCC GCT CCC ATC GAG AAG CGT GAG CCT TCT GTC AGC TGC GGC GGC AAG CGC TAC AGC TCT GGC CAG GTC GCC ACC GCC GTC GAC TAC TCT GAC TCC AAC GCG GCT CCC AGC ACC ACC TAC CCT CAC CAG AAC AAC TAC GAG GGC TTC AAC TTC CGC GCC TAC TGC TCC GAC TCC ACC TAC GAC GAG TAC CCC TTG ACC ACC AGC GGC TAC ACC GGC GGA TCT CCC GGT CCC GAC CGT GTC ATT GTC GGT CGC…
smut_2965-79	ATG AAG TTT GCC ACC CTC GCC GTT CTC TCT CTC GCC GCC GTC GTG GTG TCC GCT CCC ATC GAG AAG CGT GAG CCT TCT GTC AGC TGC GGC GGC AAG CGC TAC AGC TCT GGC CAG GTC GCC ACC GCC GTC GAC TAC TCT GAC TCC AAC GCG GCT CCC AGC ACC ACC TAC CCT CAC CAG TAC AAC AAC TAC GAG GGC TTC AAC TTC CGC GCC TAC TGC TCC GAC TCC ACC TAC GAC TAC CCC TTG ACC ACC AGC GGC TAC ACC GGC GGA TCT CCC GGT CCC GAC CGT GTC ATT GTC GGT CGC…
smut_2965-96	ATG AAG TTT GCC ACC CTC GCC GTT CTC TCT CTC GCC GCC GTC GTG GTG TCC GCT CCC ATC GAG AAG CGT GAG CCT TCT GTC AGC TGC GGC GGC AAG CGC TAC AGC TCT GGC CAG GTC GCC ACC GCC GTC GAC TAC TCT GAC TCC AAC GCG GCT CCC AGC ACC ACC TAC CCT CAC CAG TAC AAC AAC TAC GAG GGC TTC AAC TTC CGC GCC TAC TGC TCC GAC TCC ACC TAC GAC GAG TAC CCC TTG ACC ACC AGC GGC TAC ACC GGC GGA TCT CCC GGT CCC GAC GTC ATT GTC GGT CGC…
smut_2965-112	ATG AAG TTT GCC ACC CTC GCC GTT CTC TCT CTC GCC GCC GTC GTG GTG TCC GCT CCC ATC GAG AAG CGT GAG CCT TCT GTC AGC TGC GGC GGC AAG CGC TAC AGC TCT GGC CAG GTC GCC ACC GCC GTC GAC TAC TCT GAC TCC AAC GCG GCT CCC AGC ACC ACC TAC CCT CAC CAG TAC AAC AAC TAC GAG GGC TTC AAC TTC CGC GCC TAC TGC TCC GAC TCC ACC TAC GAC GAG TAC CCC TTG ACC ACC AGC GGC TAC ACC GGC GGA TCT CCC GGT CCC GAC CGT GTC ATT GTC GGT…
smut_5844-68	ATG AAG CTT GCG ATT GCA ACC TCC TTC GCT CTC ATC GGC GCC AGC CTG GCC GCT GTT GCC GAA CCT CTT GAC ACT CGC GCC ATT ACC CAA ACG AAG ACT CTC AAC GCG ACT CTC CGC TGC GAT TTC CTG GTG ACG ACG GGT GCC AAC TTC AAC AAC AGA ACG TTC GCC CTT GAT GCG ACA GTC CAG CTT CCA CAG AGC GTG GCC GGG CAA CCC TTC AAC CTC ACA GCC AGT TTC CGC CTC ACG AAC GAG CTC AGC TAC ATC CGA ACC CTT CTT CAT GCA CTC GGC GGA CGG ACC CTT GGC…
smut_5844-147	ATG AAG CTT GCG ATT GCA ACC TCC TTC GCT CTC ATC GGC GCC AGC CTG GCC GCT GTT GCC GAA CCT CTT GAC ACT CGC GCC ATT ACC CAA ACG AAG ACT CTC AAC GCG ACT CTC CGC TGC GAT TTC CTG GTG ACG ACG GGT GCC AAC TTC AAC AAC AGA ACG TTC GCC CTT GAT GCG ACA GTC CAG CTT CCA CAG AGC GTG GAT GCC GGG CAA CCC TTC AAC CTC ACA GCC AGT TTC CGC CTC ACG AAC GAG CTC AGC TAC ATC CGA ACC CTT CTT CAT GCA CTC GGC GGA CGG ACC CTT…
